# Supplementary material
Source: HighWire-hosted journal article supplement (doi:10.1101/rna.080476.125)
Supplement: Supplemental_Table_S1.docx [file Supplemental_Table_S1.docx]

**Table S1**

|  | Forward (5´-3´) and Reverse (5´-3´) oligonucleotide sequences |
| --- | --- |
| **Plasmid Cloning** |  |
| G16 linker | GGCCGGCGGAGGGGGCGGAGGAGGGGGCGGCGGAGGCGGCGGCGGAGGGGGA and GGCCTCCCCCTCCGCCGCCGCCTCCGCCGCCCCCTCCTCCGCCCCCTCCGCC |
| UPF1-NKR-GFP | GTGTGCTCCGAGCGCCATCGCCGTGGAC and GCCTCTGCGCCGCCAGCCGTGAGGCCATC and CATCCTGTCCTGTGTGGCCGCCAACGAGCACCAAG |
| **Assays for qPCR** |  |
| beta-Actin | TCCATCATGAAGTGTGACGT and TACTCCTGCTTGCTGATCCAC |
| hnRNPL Protein | CAATCTCAGTGGACAAGGTG and CTCCATATTCTGCGGGGTGA |
| hnRNPL NMD | GGTCGCAGTGTATGTTTGATG and GGCGTTTGTTGGGGTTGCT |
| RP9P | CAAGCGCCTGGAGTCCTTAA and AGGAGGTTTTTCATAACTCGTGATCT |
| TRA2B NMD | TGGAATCAGAAAGCACTACGC and GAATCTTCCTTGGAGCGAGA |

**Table S1.** Oligonucleotides (from Microsynth, Switzerland) used in the study. Changes to alanines are underlined.
